# Supplementary material
Source: PubMed Central journal article supplement (PMC321772)

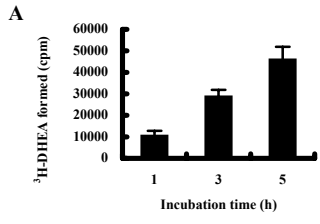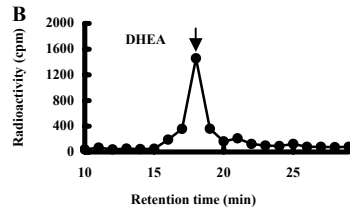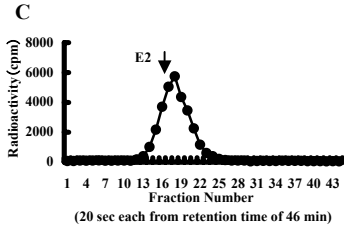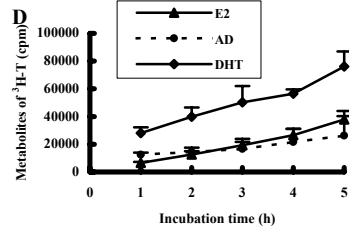

Supplement: pnas_2630225100_3.pdf [file pnas_2630225100_3.pdf]
